# Supplementary material
Source: Springer Nature journal article supplement (https://www.springermedizin.de/resource/supplementary/12913_2013_2950_MOESM1_ESM.pdf/9532010)
Supplement: MOESM1 [file 9532010]

## Additional file I Full search strategy

Database: EBM Reviews - Cochrane Central Register of Controlled Trials <March 2013>

Search Strategy:

- 
- 1 exp vascular diseases/ (47049)
  - 2 vascular.tw. (12203)
  - 3 exp Kidney Failure, Chronic/ (2735)
  - 4 chronic kidney disease\$.tw. (854)
  - 5 exp cardiovascular diseases/ (59831)
  - 6 cardiovascular.tw. (16915)
  - 7 exp cerebrovascular disorders/ (6749)
  - 8 cerebrovascular.tw. (1803)
  - 9 exp peripheral vascular diseases/ (1973)
  - 10 (peripheral adj5 disease).tw. (1520)
  - 11 exp Myocardial Isch?emia/ (17949)
  - 12 (isch?emic adj5 disease).tw. (1620)
  - 13 exp stroke/ (3311)
  - 14 exp isch?emic Attack, Transient/ (423)
  - 15 isch\$emic.tw. (6990)
  - 16 exp heart failure/ (4376)
  - 17 heart failure.tw. (7614)
  - 18 cardiac failure.tw. (420)
  - 19 exp diabetes mellitus/ (12444)
  - 20 diab\$.tw. (21881)
  - 21 exp hypertension/ (12373)
  - 22 hypertensi\$.tw. (22979)
  - 23 or/1-22 (107364)
  - 24 exp telecommunications/ (2278)
  - 25 (telemetr\$ or telemed\$ or tele?med\$ or telehealth\$ or tele?health\$ or telecare or tele?care or telehome or tele?home).tw. (580)
  - 26 (telemonitor\$ or tele?monit\$ or teleconsult\$ or tele?consult\$ or teleconferenc\$ or telecommunicat\$ or tele?communicat\$.tw. (255)
  - 27 (telephon\$ or phones\$.tw. (4418)
  - 28 exp remote consultation/ (200)
  - 29 (remote\$ adj (consult\$ or monitor\$)).tw. (36)
  - 30 or/24-29 (5893)
  - 31 23 and 30 (1172)

Database: Embase <1980 to 2013 Week 15>

Search Strategy:

---

- 1 exp vascular diseases/ (1627485)
- 2 vascular.tw. (488859)
- 3 exp Kidney Failure, Chronic/ (53353)
- 4 chronic kidney disease\$.tw. (22115)
- 5 exp cardiovascular diseases/ (2697417)
- 6 cardiovascular.tw. (334125)
- 7 exp cerebrovascular disorders/ (328828)
- 8 cerebrovascular.tw. (45217)
- 9 exp peripheral vascular diseases/ (1144749)
- 10 (peripheral adj5 disease).tw. (26264)
- 11 exp Myocardial Isch?emia/ (68127)
- 12 (isch?emic adj5 disease).tw. (39358)
- 13 exp stroke/ (50733)
- 14 exp isch?emic Attack, Transient/ (22504)
- 15 isch\$emic.tw. (175999)
- 16 exp heart failure/ (259546)
- 17 heart failure.tw. (136667)
- 18 cardiac failure.tw. (12063)
- 19 exp diabetes mellitus/ (531666)
- 20 diab\$.tw. (503033)
- 21 exp hypertension/ (434720)
- 22 hypertensi\$.tw. (387633)
- 23 or/1-22 (3522640)
- 24 exp telecommunications/ (32452)
- 25 (telemetr\$ or telemed\$ or tele?med\$ or telehealth\$ or tele?health\$ or telecare or tele?care or telehome or tele?home).tw. (15540)
- 26 (telemonitor\$ or tele?monit\$ or teleconsult\$ or tele?consult\$ or teleconferenc\$ or telecommunicat\$ or tele?communicat\$).tw. (4700)
- 27 (telephon\$ or phones\$).tw. (49819)
- 28 exp remote consultation/ (5017)
- 29 (remote\$ adj (consult\$ or monitor\$)).tw. (1212)
- 30 or/24-29 (87541)
- 31 random\$.af. (920049)
- 32 23 and 30 and 31 (2621)

Database: Ovid MEDLINE(R) <1946 to April Week 2 2013>

Search Strategy:

---

- 1 exp vascular diseases/ (1261988)
- 2 vascular.tw. (378020)
- 3 exp Kidney Failure, Chronic/ (74607)
- 4 chronic kidney disease\$.tw. (14279)
- 5 exp cardiovascular diseases/ (1774871)
- 6 cardiovascular.tw. (235559)
- 7 exp cerebrovascular disorders/ (259755)
- 8 cerebrovascular.tw. (33423)
- 9 exp peripheral vascular diseases/ (42327)
- 10 (peripheral adj5 disease).tw. (18534)
- 11 exp Myocardial Isch?emia/ (339876)
- 12 (isch?emic adj5 disease).tw. (30158)
- 13 exp stroke/ (76211)
- 14 exp isch?emic Attack, Transient/ (16996)
- 15 isch\$emic.tw. (127710)
- 16 exp heart failure/ (80812)
- 17 heart failure.tw. (92579)
- 18 cardiac failure.tw. (9300)
- 19 exp diabetes mellitus/ (294064)
- 20 diab\$.tw. (357049)
- 21 exp hypertension/ (200822)
- 22 hypertensi\$.tw. (284941)
- 23 or/1-22 (2519736)
- 24 exp telecommunications/ (56255)
- 25 (telemetr\$ or telemed\$ or tele?med\$ or telehealth\$ or tele?health\$ or telecare or tele?care or telehome or tele?home).tw. (11995)
- 26 (telemonitor\$ or tele?monit\$ or teleconsult\$ or tele?consult\$ or teleconferenc\$ or telecommunicat\$ or tele?communicat\$).tw. (3582)
- 27 (telephon\$ or phones\$).tw. (38145)
- 28 exp remote consultation/ (3375)
- 29 (remote\$ adj (consult\$ or monitor\$)).tw. (687)
- 30 or/24-29 (90062)
- 31 random\$.af. (767789)
- 32 23 and 30 and 31 (1987)
